# Supplementary material for: Ageing is associated with molecular signatures of inflammation and type 2 diabetes in rat pancreatic islets
Source: PubMed Central journal article supplement (PMC4742511; doi:10.1007/s00125-015-3837-8), 2015-12-23
Supplement: 125_2015_3837_MOESM1_ESM.pdf [file 125_2015_3837_MOESM1_ESM.pdf]

**ESM Table 1** Genes with age-related expression changes in rat islets and previously associated with T2D traits or islet function

| Symbol         | Gene name                                                     | Fold change | Significance                                                                                                                                 | Reference (PMID)     |
|----------------|---------------------------------------------------------------|-------------|----------------------------------------------------------------------------------------------------------------------------------------------|----------------------|
| <i>Reg3a</i>   | Regenerating islet-derived 3 alpha                            | +7.6        | Increased expression in human pancreatic beta cells of individuals with T2D                                                                  | 20644627             |
| <i>Reg3g</i>   | Regenerating islet-derived 3 gamma                            | +5.4        | Increased expression in human pancreatic beta cells of individuals with T2D                                                                  | 20644627             |
| <i>Onecut1</i> | One cut homeobox 1                                            | +4.2        | Required for islet beta cell development; postnatal expression alters beta cell function                                                     | 17130469             |
| <i>Ptf1a</i>   | Pancreas specific transcription factor, 1a                    | +3.5        | Role in early pancreas development; mutations in <i>PTF1A</i> cause pancreatic agenesis associated with permanent neonatal diabetes mellitus | 15543146<br>18519637 |
| <i>Kcnq1</i>   | Potassium voltage-gated channel, KQT-like subfamily, member 1 | +2.9        | GWAS association with T2D                                                                                                                    | 18711367             |
| <i>Hmox1</i>   | Heme oxygenase (decycling) 1                                  | +2.9        | Longer (GT) <sub>n</sub> repeats in the gene promoter are associated with increased risk for T2D                                             | 20682519             |
| <i>Cyp2e1</i>  | Cytochrome P450, family 2, subfamily e, polypeptide 1         | +2.7        | Human pancreatic beta cells expressing <i>CYP2E1</i> are more susceptible to DNA damage and cytotoxicity                                     | 15242818             |
| <i>Hsd11b1</i> | Hydroxysteroid 11-beta dehydrogenase 1                        | +2.6        | Expressed by the pancreatic alpha cells; regulates insulin and glucagon secretion                                                            | 18779947             |
| <i>Tspan8</i>  | Tetraspanin 8                                                 | +2.6        | GWAS association with T2D; increased expression in human pancreatic beta cells of individuals with T2D                                       | 18372903<br>20644627 |
| <i>Tmed6</i>   | Transmembrane emp24 protein transport domain containing 6     | +2.6        | Expression restricted to pancreatic islets, with higher levels in alpha cells; expression reduced in diabetic Goto-Kakizaki rats             | 22129529             |
| <i>Ptger3</i>  | Prostaglandin E receptor 3 (subtype EP3)                      | +2.5        | Increased expression in islets of BTBR diabetic mice; negatively regulates glucose- and hormone-stimulated insulin secretion                 | 23349487             |

|               |                                                                |      |                                                                                                                                                                                                                    |                      |
|---------------|----------------------------------------------------------------|------|--------------------------------------------------------------------------------------------------------------------------------------------------------------------------------------------------------------------|----------------------|
| <i>S100a6</i> | S100 calcium binding protein A6                                | +2.5 | Controls the Ca <sup>2+</sup> -dependent insulin release from the pancreatic beta cell                                                                                                                             | 8119959              |
| <i>Aif1</i>   | Allograft inflammatory factor 1                                | +2.3 | Present in the pancreas of prediabetic BB rats; alters glucose-stimulated insulin secretion                                                                                                                        | 9391121              |
| <i>Myc</i>    | Myelocytomatosis oncogene                                      | +2.3 | Overexpression of c-Myc in isolated pancreatic islets suppresses insulin gene transcription and glucose-stimulated insulin secretion; transgenic mice overexpressing c-Myc in beta cells develop neonatal diabetes | 11799123<br>12031967 |
| <i>Ctgf</i>   | Connective tissue growth factor                                | +2.3 | Promotes proliferation of developing beta cells                                                                                                                                                                    | 21876171             |
| <i>Apcs</i>   | Amyloid P component, serum                                     | +2.0 | Increased expression in islets of patients with T2D                                                                                                                                                                | 14578294             |
| <i>Maf</i>    | v-Maf musculoaponeurotic fibrosarcoma oncogene homolog (avian) | +1.9 | Activates basal expression of the glucagon gene                                                                                                                                                                    | 17901057             |
| <i>Fbp1</i>   | Fructose-1,6-bisphosphatase 1                                  | +1.8 | Regulates glucose-stimulated insulin secretion of mouse pancreatic beta cells                                                                                                                                      | 20719858             |
| <i>Itgb6</i>  | Integrin, beta 6                                               | +1.8 | GWAS association with T2D                                                                                                                                                                                          | 20418489             |
| <i>Fbp2</i>   | Fructose-1,6-bisphosphatase 2                                  | +1.8 | Highly expressed in human and rat pancreatic islets; regulates glucose-stimulated insulin secretion in pancreatic beta cells                                                                                       | 15047617<br>18039179 |
| <i>Enpp1</i>  | Ectonucleotide pyrophosphatase/phosphodiesterase 1             | +1.7 | Association with T2D by genome-wide familial linkage studies; increased expression in human pancreatic islets of individuals with T2D                                                                              | 18071025<br>16096055 |
| <i>Tspan4</i> | Tetraspanin 4                                                  | +1.7 | Increased expression in human pancreatic islets of individuals with T2D                                                                                                                                            | 16096055             |
| <i>Sel1l</i>  | Sel-1 suppressor of lin-12-like ( <i>C. elegans</i> )          | +1.6 | Encodes an ER membrane protein that is highly expressed in the pancreatic islets; mice with heterozygous inactivation of one allele have reduced beta cell mass and develop high fat diet-induced hyperglycemia    | 21536682             |
| <i>Vps13c</i> | Vacuolar protein sorting 13 homolog C ( <i>S. cerevisiae</i> ) | +1.6 | Genetic variants at the VPS13C locus are associated with the 2 hour blood glucose after an oral glucose challenge                                                                                                  | 20081857<br>21789219 |
| <i>Txnip</i>  | Thioredoxin interacting protein                                | +1.6 | Proapoptotic protein; <i>Txnip</i> deficiency inhibits the mitochondrial death pathway                                                                                                                             | 19875615             |

|                 |                                                               |      |                                                                                                                                                                                                                                        |                                |
|-----------------|---------------------------------------------------------------|------|----------------------------------------------------------------------------------------------------------------------------------------------------------------------------------------------------------------------------------------|--------------------------------|
|                 |                                                               |      | underlying beta cell glucotoxicity                                                                                                                                                                                                     |                                |
| <i>Pla2g4a</i>  | Phospholipase A2, group IVA (cytosolic, calcium-dependent)    | +1.6 | Participates in glucose-induced insulin secretion                                                                                                                                                                                      | 9030192<br>21896929            |
| <i>Eif4ebp1</i> | Eukaryotic translation initiation factor 4E binding protein 1 | +1.6 | Encodes 4E-BP1 involved in regulation of protein translation; its expression is increased in islets of diabetic mice and <i>Eif4ebp1</i> deletion accelerates beta cell loss and exacerbates hyperglycemia in mouse models of diabetes | 18316032                       |
| <i>Tlr2</i>     | Toll-like receptor 2                                          | +1.5 | Tlr2-deficient mice are protected against beta cell dysfunction induced by a high-fat diet                                                                                                                                             | 20407745                       |
| <i>Csrp1</i>    | Cysteine and glycine-rich protein 1                           | +1.5 | Increased expression in human pancreatic islets of individuals with T2D                                                                                                                                                                | 16096055                       |
| <i>Agmo</i>     | Alkylglycerol monooxygenase                                   | +1.5 | Also known as TMEM195; GWAS associations with fasting glucose, indices of beta-cell function (HOMA-B) and T2D                                                                                                                          | 20081858<br>20419449           |
| <i>Cartpt</i>   | CART prepropeptide                                            | -2.3 | CART regulates islet hormone secretion and is overexpressed in beta cells of T2D rats                                                                                                                                                  | 16443761                       |
| <i>Npy</i>      | Neuropeptide Y                                                | -2.3 | Insulin secretion is increased in pancreatic islets of <i>Npy</i> -deficient mice                                                                                                                                                      | 17717054                       |
| <i>Fev</i>      | FEV (ETS oncogene family)                                     | -2.1 | Mice lacking <i>Fev</i> ( <i>Pet1</i> ) have reduced insulin production and secretion and impaired glucose tolerance                                                                                                                   | 22013016                       |
| <i>Abcc8</i>    | ATP-binding cassette, subfamily C (CFTR/MRP), member 8        | -2.0 | Mutations in <i>ABCC8</i> result in permanent or transient neonatal diabetes mellitus, hyperinsulinemic hypoglycaemia familial, type 1 or are associated with T2D                                                                      | 7716548<br>8635661<br>16885549 |
| <i>Hmgn3</i>    | High mobility group nucleosomal binding domain 3              | -1.9 | Expressed in all pancreatic endocrine islet cells and controls insulin and glucagon levels; <i>Hmgn3</i> <sup>-/-</sup> mice have a mild diabetic phenotype                                                                            | 19651901<br>19885867           |
| <i>Chga</i>     | Chromogranin A (parathyroid secretory protein 1)              | -1.8 | <i>Chga</i> <sup>-/-</sup> mice have reduced islets size and decreased plasma insulin concentrations                                                                                                                                   | 18722481                       |

|               |                                                                  |      |                                                                                                                                                                                                                                                                                                                                                                                                    |                                             |
|---------------|------------------------------------------------------------------|------|----------------------------------------------------------------------------------------------------------------------------------------------------------------------------------------------------------------------------------------------------------------------------------------------------------------------------------------------------------------------------------------------------|---------------------------------------------|
| <i>Gipr</i>   | Gastric inhibitory polypeptide receptor                          | -1.7 | GWAS association with the glucose and insulin responses to an oral glucose tolerance test; <i>Gipr</i> <sup>-/-</sup> mice have higher blood glucose levels with impaired initial insulin response after an oral glucose tolerance test                                                                                                                                                            | 20081857<br>10611300                        |
| <i>Pyy</i>    | Peptide YY (mapped)                                              | -1.7 | Ablation of <i>Pyy</i> in adult mice results in disruption of islet morphology and severe hyperglycaemia                                                                                                                                                                                                                                                                                           | 22562022                                    |
| <i>Gpr119</i> | G protein-coupled receptor 119                                   | -1.7 | Predominantly expressed in pancreatic polypeptide-secreting PP-cells; enhances the glucose-dependent insulin release                                                                                                                                                                                                                                                                               | 17070774<br>17289847                        |
| <i>Glp1r</i>  | Glucagon-like peptide 1 receptor                                 | -1.6 | Binds the incretin GLP1, potentiating glucose-dependent insulin secretion from islet beta cells. <i>Glp1r</i> <sup>-/-</sup> mice show glucose intolerance and low levels of circulating insulin; selective restoration of GLP1R in islets of <i>Glp1r</i> <sup>-/-</sup> mice improves their glucose tolerance and pharmacological activation of GLP1R stimulates beta cell proliferation in mice | 8898756<br>14966573<br>22182839             |
| <i>Plag1</i>  | Pleiomorphic adenoma gene 1                                      | -1.6 | <i>Plag1</i> overexpression leads to increased beta cell mass and hyperinsulinemia                                                                                                                                                                                                                                                                                                                 | 20522588                                    |
| <i>Nkx2-2</i> | NK2 homeobox 2                                                   | -1.6 | <i>Nkx2-2</i> <sup>-/-</sup> mice develop diabetes due to arrested differentiation of pancreatic beta cells; essential for initiation of pancreatic beta cell differentiation as well as for maintenance of beta cell function in the mature islets; prevents beta to alpha cell reprogramming                                                                                                     | 9584121<br>14729487<br>17456846<br>22056672 |
| <i>Isl1</i>   | ISL LIM homeobox 1                                               | -1.6 | Required for the in the maturation, proliferation, and survival of the endocrine pancreatic cells; mediates the action of leptin on insulin secretion in mice                                                                                                                                                                                                                                      | 19502415<br>23504315                        |
| <i>Mafb</i>   | v-Maf musculoaponeurotic fibrosarcoma oncogene homolog B (avian) | -1.5 | Expressed in both alpha and beta cells during early development and only in alpha cells in adult life, regulating glucagon expression; <i>Mafb</i> -deficient mice show preferential reduction of beta cells.                                                                                                                                                                                      | 16443760<br>18199433<br>20627934            |
