# Supplementary material for: Ageing is associated with molecular signatures of inflammation and type 2 diabetes in rat pancreatic islets
Source: PubMed Central journal article supplement (PMC4742511; doi:10.1007/s00125-015-3837-8), 2015-12-23
Supplement: 125_2015_3837_MOESM3_ESM.pdf [file 125_2015_3837_MOESM3_ESM.pdf]

**ESM Table 3** DNA methylation levels at gene promoter regions in rat islets measured by bisulfite MassArray analysis

| Gene                                    | 3M (%)       | 15M (%)       | p value       |
|-----------------------------------------|--------------|---------------|---------------|
| Gene expression down-regulated with age |              |               |               |
| <i>Aurkb</i>                            | 2.2 (± 0.1)  | 3.1 (± 0.2)   | <b>0.0087</b> |
| <i>Gjb6</i>                             | 75.9 (± 2.9) | 76.3 (± 1.9)  | 0.7879        |
| <i>Fam183b</i>                          | 9.5 (± 1.2)  | 10.9 (± 0.7)  | 0.5844        |
| <i>Cartpt</i>                           | 6.1 (± 0.3)  | 8.53 (± 0.27) | <b>0.0022</b> |
| <i>Npy</i>                              | 2.1 (± 0.3)  | 3.3 (± 0.2)   | <b>0.0152</b> |
| <b><i>Cd79b</i></b>                     | 91.7 (± 2.1) | 86.1 (± 1.1)  | <b>0.0455</b> |
| <i>Abcc8</i>                            | 4.3 (± 0.2)  | 5.6 (± 0.2)   | <b>0.0043</b> |
| <i>Gipr</i>                             | 12.4 (± 1.2) | 16.1 (± 0.8)  | <b>0.026</b>  |
| <b><i>Pyy</i></b>                       | 48.4 (± 2.6) | 32.9 (± 0.8)  | <b>0.0022</b> |
| <b><i>Gpr119</i></b>                    | 12.0 (± 4.5) | 40.3 (± 3.6)  | <b>0.0087</b> |
| Gene expression up-regulated with age   |              |               |               |
| <b><i>Cxcl9</i></b>                     | 72.0 (± 1.5) | 59.8 (± 0.6)  | <b>0.0022</b> |
| <b><i>Spp1</i></b>                      | 71.8 (± 0.6) | 62.2 (± 0.6)  | <b>0.0022</b> |
| <i>Reg3a</i>                            | 93.8 (± 0.7) | 91.9 (± 0.5)  | <b>0.0455</b> |
| <b><i>Reg3b</i></b>                     | 2.4 (± 0.6)  | 14.6 (± 1.9)  | <b>0.0022</b> |
| <b><i>Tf</i></b>                        | 30.2 (± 0.9) | 21.8 (± 1.1)  | <b>0.0043</b> |
| <b><i>Prss35</i></b>                    | 29.7 (± 1.9) | 23.3 (± 0.6)  | <b>0.0087</b> |
| <i>Serpina1a</i>                        | 60.3 (± 3.6) | 50.2 (± 2.9)  | 0.1212        |
| <b><i>Col3a1</i></b>                    | 67.4 (± 3.2) | 49.3 (± 2.3)  | <b>0.0087</b> |
| <b><i>C4b</i></b>                       | 68.1 (± 2.6) | 41.9 (± 2.8)  | <b>0.0022</b> |
| <b><i>Dpt</i></b>                       | 78.4 (± 2.1) | 61.1 (± 2.3)  | <b>0.0022</b> |
| <i>Aldob</i>                            | 16.7 (± 3.4) | 18.5 (± 1.6)  | 0.5714        |
| <i>Ptfla</i>                            | 10.2 (± 0.5) | 9.4 (± 0.2)   | 0.303         |
| <b><i>Cldn10</i></b>                    | 63.5 (± 5.0) | 77.7 (± 2.1)  | <b>0.026</b>  |
| <i>Colla1</i>                           | 37.4 (± 1.5) | 33.4 (± 3.4)  | 0.1797        |
| <i>Gatm</i>                             | 4.8 (± 0.1)  | 5.0 (± 0.2)   | 0.329         |
| <i>Lgals3</i>                           | 2.9 (± 0.2)  | 2.9 (± 0.3)   | 0.7273        |

|                 |              |              |               |
|-----------------|--------------|--------------|---------------|
| <b>Mgst1</b>    | 16.9 (± 1.8) | 11.5 (± 0.2) | <b>0.0043</b> |
| <i>Kcnq1</i>    | 3.5 (± 0.6)  | 3.3 (± 0.5)  | 0.8983        |
| <b>Lgals1</b>   | 35.6 (± 2.1) | 26.9 (± 0.3) | <b>0.026</b>  |
| <b>Pah</b>      | 86.8 (± 0.7) | 56.5 (± 1.7) | <b>0.0022</b> |
| <i>Fmo1</i>     | 65.3 (± 1.9) | 62.2 (± 2.5) | 0.474         |
| <b>Il33</b>     | 92.1 (± 0.8) | 77.3 (± 3.3) | <b>0.0043</b> |
| <i>Tspan8</i>   | 20.2 (± 1.4) | 18.2 (± 3.0) | 0.974         |
| <i>Ptger3</i>   | 8.2 (± 0.9)  | 9.3 (± 0.5)  | 0.5714        |
| <i>S100a6</i>   | 23.5 (± 1.4) | 21.8 (± 0.8) | 0.3052        |
| <i>Ccdc80</i>   | 1.6 (± 0.1)  | 2.8 (± 0.7)  | 0.3203        |
| <i>Ddah1</i>    | 6.2 (± 0.4)  | 6.2 (± 0.4)  | 0.8939        |
| <b>S100a4</b>   | 81.2 (± 1.6) | 75.0 (± 1.0) | <b>0.0087</b> |
| <i>Gbp2</i>     | 55.2 (± 2.5) | 53.1 (± 2.3) | 0.5628        |
| <i>Lgals2</i>   | 41.2 (± 2.9) | 43.3 (± 9.1) | 0.8745        |
| <i>Ctss</i>     | 84.7 (± 1.5) | 84.8 (± 0.3) | > 0.9999      |
| <i>Itgb6</i>    | 19.4 (± 3.1) | 25.4 (± 1.8) | 0.0931        |
| <b>Fbp2</b>     | 59.4 (± 5.0) | 34.9 (± 2.6) | <b>0.0022</b> |
| <i>Serping1</i> | 9.6 (± 0.9)  | 13.3 (± 0.3) | <b>0.026</b>  |
| <i>Tspan4</i>   | 6.1 (± 0.2)  | 5.9 (± 0.6)  | 0.0931        |
| <b>Dmbt1</b>    | 66.2 (± 3.2) | 74.1 (± 1.1) | <b>0.026</b>  |
| <b>LINE-1</b>   | 84.2 (± 0.5) | 78.7 (± 0.5) | <b>0.0022</b> |

Data represent mean values ± SEM (n=5-6 samples per group). P values were obtained by Mann-Whitney tests and significant differences are written in bold. Gene symbols written in bold and color are those that associate an absolute difference in methylation above 5% and p value <0.05 (red – loss of methylation with age; blue – gain of methylation with age).
