# Supplementary material for: Ageing is associated with molecular signatures of inflammation and type 2 diabetes in rat pancreatic islets
Source: PubMed Central journal article supplement (PMC4742511; doi:10.1007/s00125-015-3837-8), 2015-12-23
Supplement: 125_2015_3837_MOESM8_ESM.pdf [file 125_2015_3837_MOESM8_ESM.pdf]

**a**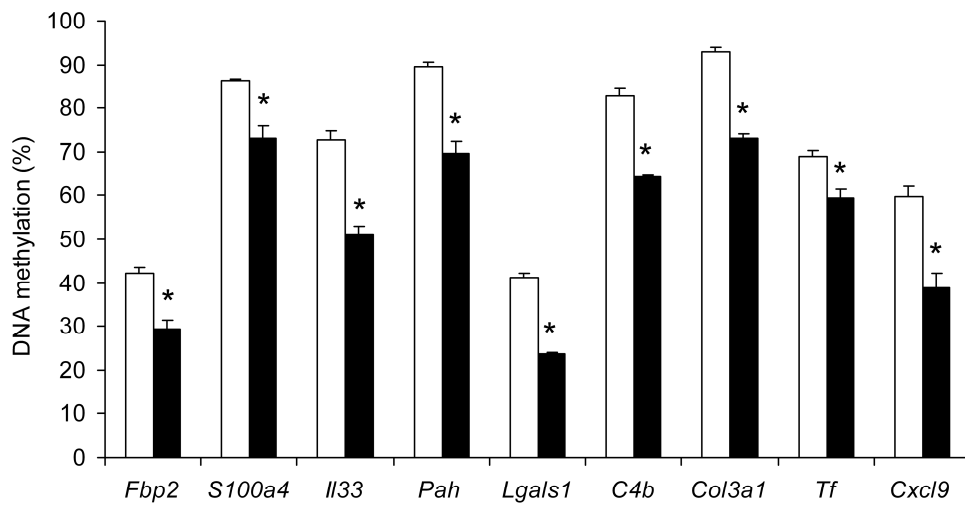**b**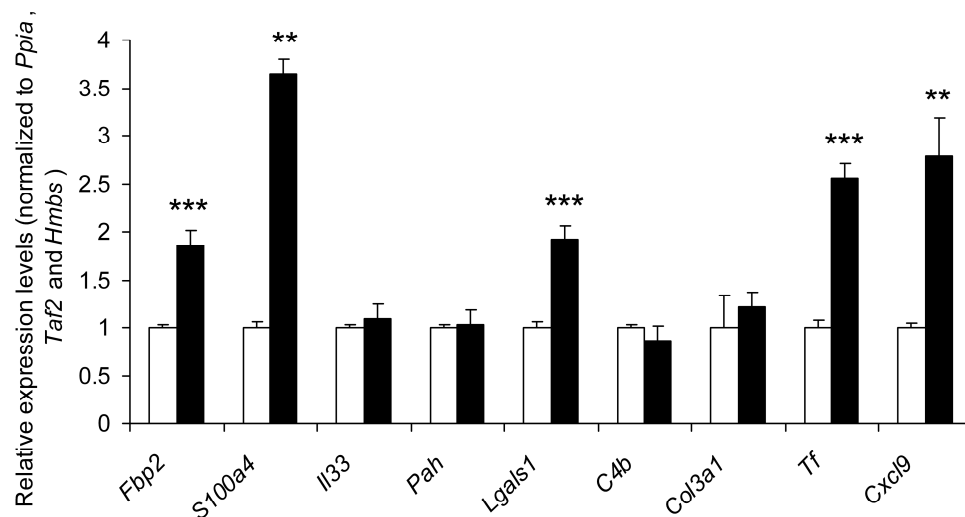

**ESM Fig. 3** Zebularine treatment in BRIN-BD11 cells. **(a)** Bisulfite MassArray analysis of DNA methylation levels in cells exposed to vehicle (dimethyl sulfoxide – DMSO) or to 100  $\mu$ M zebularine. Data represents the mean of n=4 samples per group. **(b)** Expression analysis by quantitative real-time PCR (qRT-PCR). Data represents the mean of n=6 samples per group. For both panels black bars correspond to BRIN-BD11 cells treated with 100  $\mu$ M zebularine and white bars to control cells treated with vehicle (DMSO) only. Data represents mean values; error bars represent SEM; \* p<0.05; \*\* p<0.01; \*\*\* p<0.001 by Mann-Whitney tests for panel (a) and obtained by using REST 2009 for panel (b).
