# Supplementary material for: Ageing is associated with molecular signatures of inflammation and type 2 diabetes in rat pancreatic islets
Source: PubMed Central journal article supplement (PMC4742511; doi:10.1007/s00125-015-3837-8), 2015-12-23
Supplement: 125_2015_3837_MOESM9_ESM.pdf [file 125_2015_3837_MOESM9_ESM.pdf]

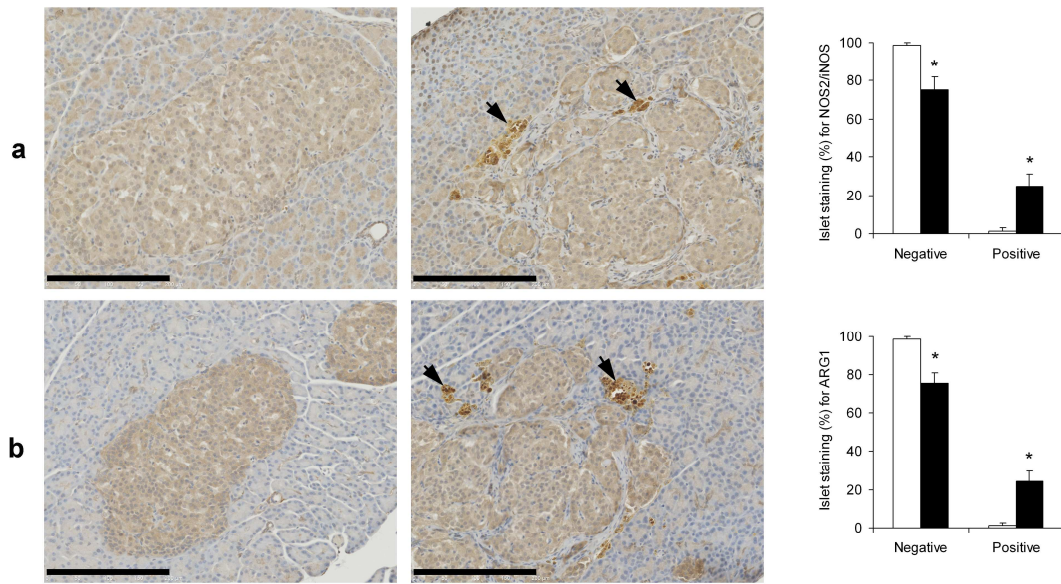

**ESM Fig. 4** Immunohistochemical analysis of M1 and M2 macrophages in three months old (3M) and fifteen months old (15M) rat pancreata. **(a)** Immunostaining for nitric oxide synthase 2 – NOS2 (also denoted as iNOS), a marker of the “classically activated”, pro-inflammatory M1 macrophages. **(b)** Immunostaining for arginase 1 – ARG1, a marker for the “alternatively-activated” anti-inflammatory M2 macrophages. For both panels the two types of macrophages are identified by strong staining against weaker staining in other cell types (arrows). Scale bars correspond to 200  $\mu$ m. The histograms on the right side indicate percentages of pancreatic islets infiltrated by the corresponding types of macrophages analyzed. Data represent the means of n=4 samples per group; error bars represent SEM; \* p<0.05 using Mann-Whitney tests.
